# Supplementary material for: Preclinical evaluation of the SARS-CoV-2 Mpro inhibitor RAY1216 shows improved pharmacokinetics compared with nirmatrelvir
Source: PubMed Central journal article supplement (PMC10994847; doi:10.1038/s41564-024-01618-9), 2024-03-29

RAY1216 (220214-04A)  
solvent=DMSO-d6

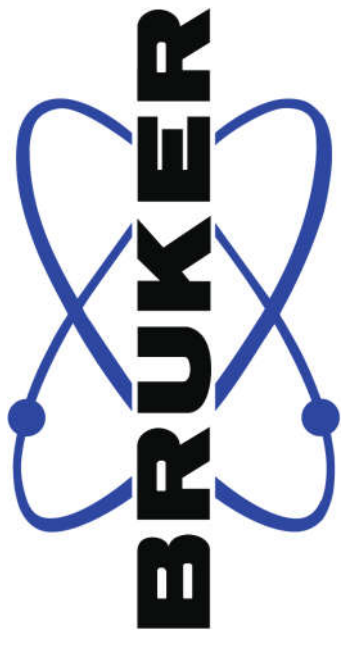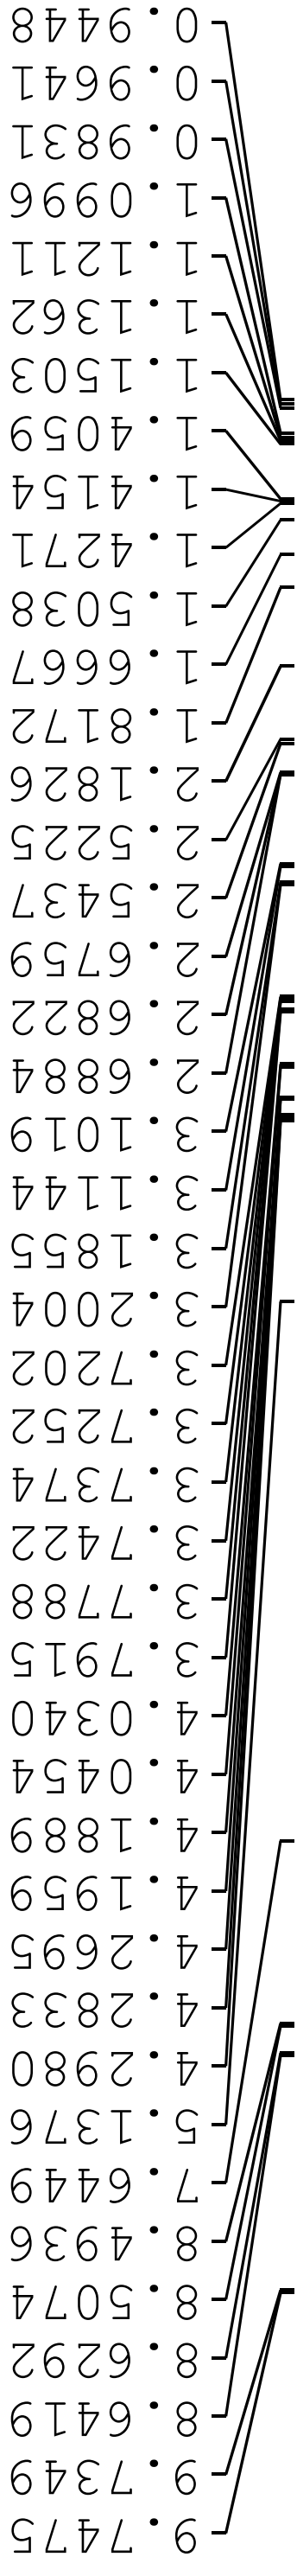

Current Data Parameters  
NAME RAY1216(220214-04A)\_1022456  
EXPNO 102  
PROCNO 1

F2 - Acquisition Parameters  
Date\_ 20220218  
Time\_ 17.32  
INSTRUM spect  
PROBHD 5 mm CPTCI 1H-  
PULPROG zg30  
TD 65536  
SOLVENT DMSO  
NS 16  
DS 2  
SWH 9615.385 Hz  
FIDRES 0.146719 Hz  
AQ 3.4078720 sec  
RG 4.52  
DW 52.000 usec  
DE 10.00 usec  
TE 298.1 K  
D1 1.00000000 sec  
TD0 1

==== CHANNEL f1 =====  
SFO1 600.1540810 MHz  
NUC1 1H  
P1 7.16 usec  
PLW1 7.00000000 W  
F2 - Processing parameters  
SI 65536  
SF 600.1499930 MHz  
WDW EM  
SSB 0  
LB 0.30 Hz  
GB 0  
PC 1.00

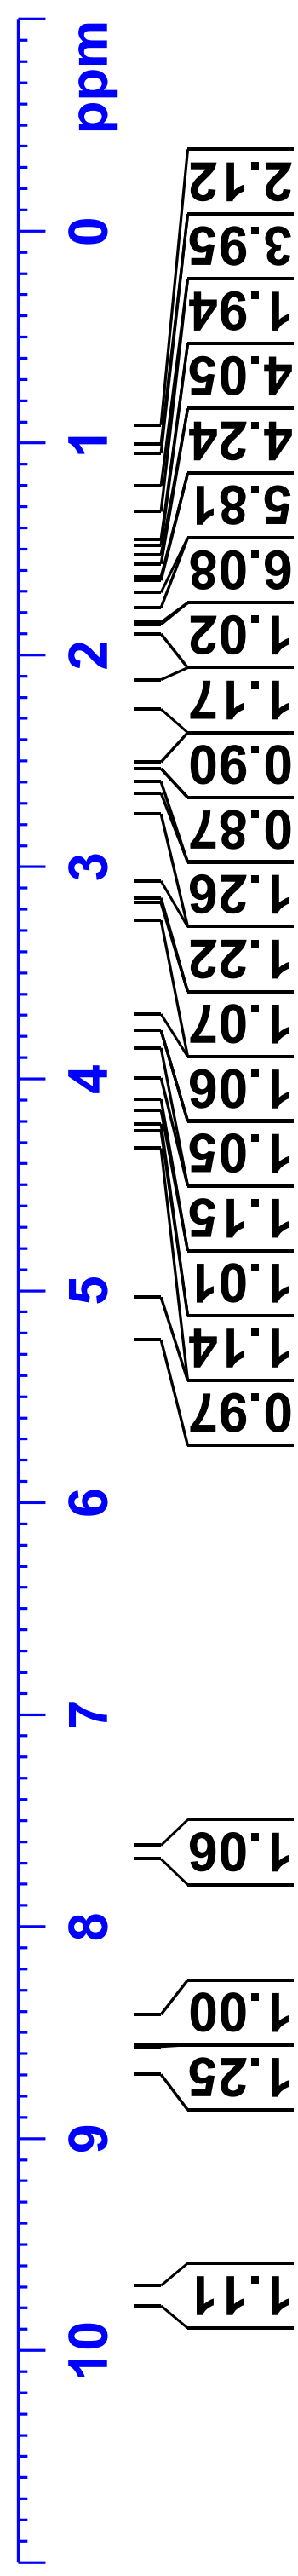

Supplement: 41564_2024_1618_MOESM4_ESM.pdf [file 41564_2024_1618_MOESM4_ESM.pdf]
