# Supplementary material for: Preclinical evaluation of the SARS-CoV-2 Mpro inhibitor RAY1216 shows improved pharmacokinetics compared with nirmatrelvir
Source: PubMed Central journal article supplement (PMC10994847; doi:10.1038/s41564-024-01618-9), 2024-03-29
Supplement: 41564_2024_1618_MOESM5_ESM.pdf [file 41564_2024_1618_MOESM5_ESM.pdf]

RAY1216 (220214-04A)  
solvent=DMSO-d6

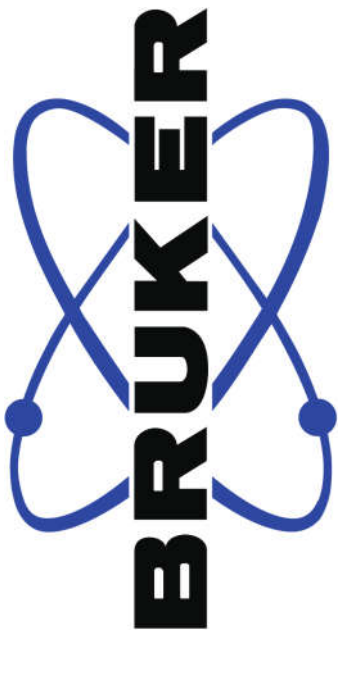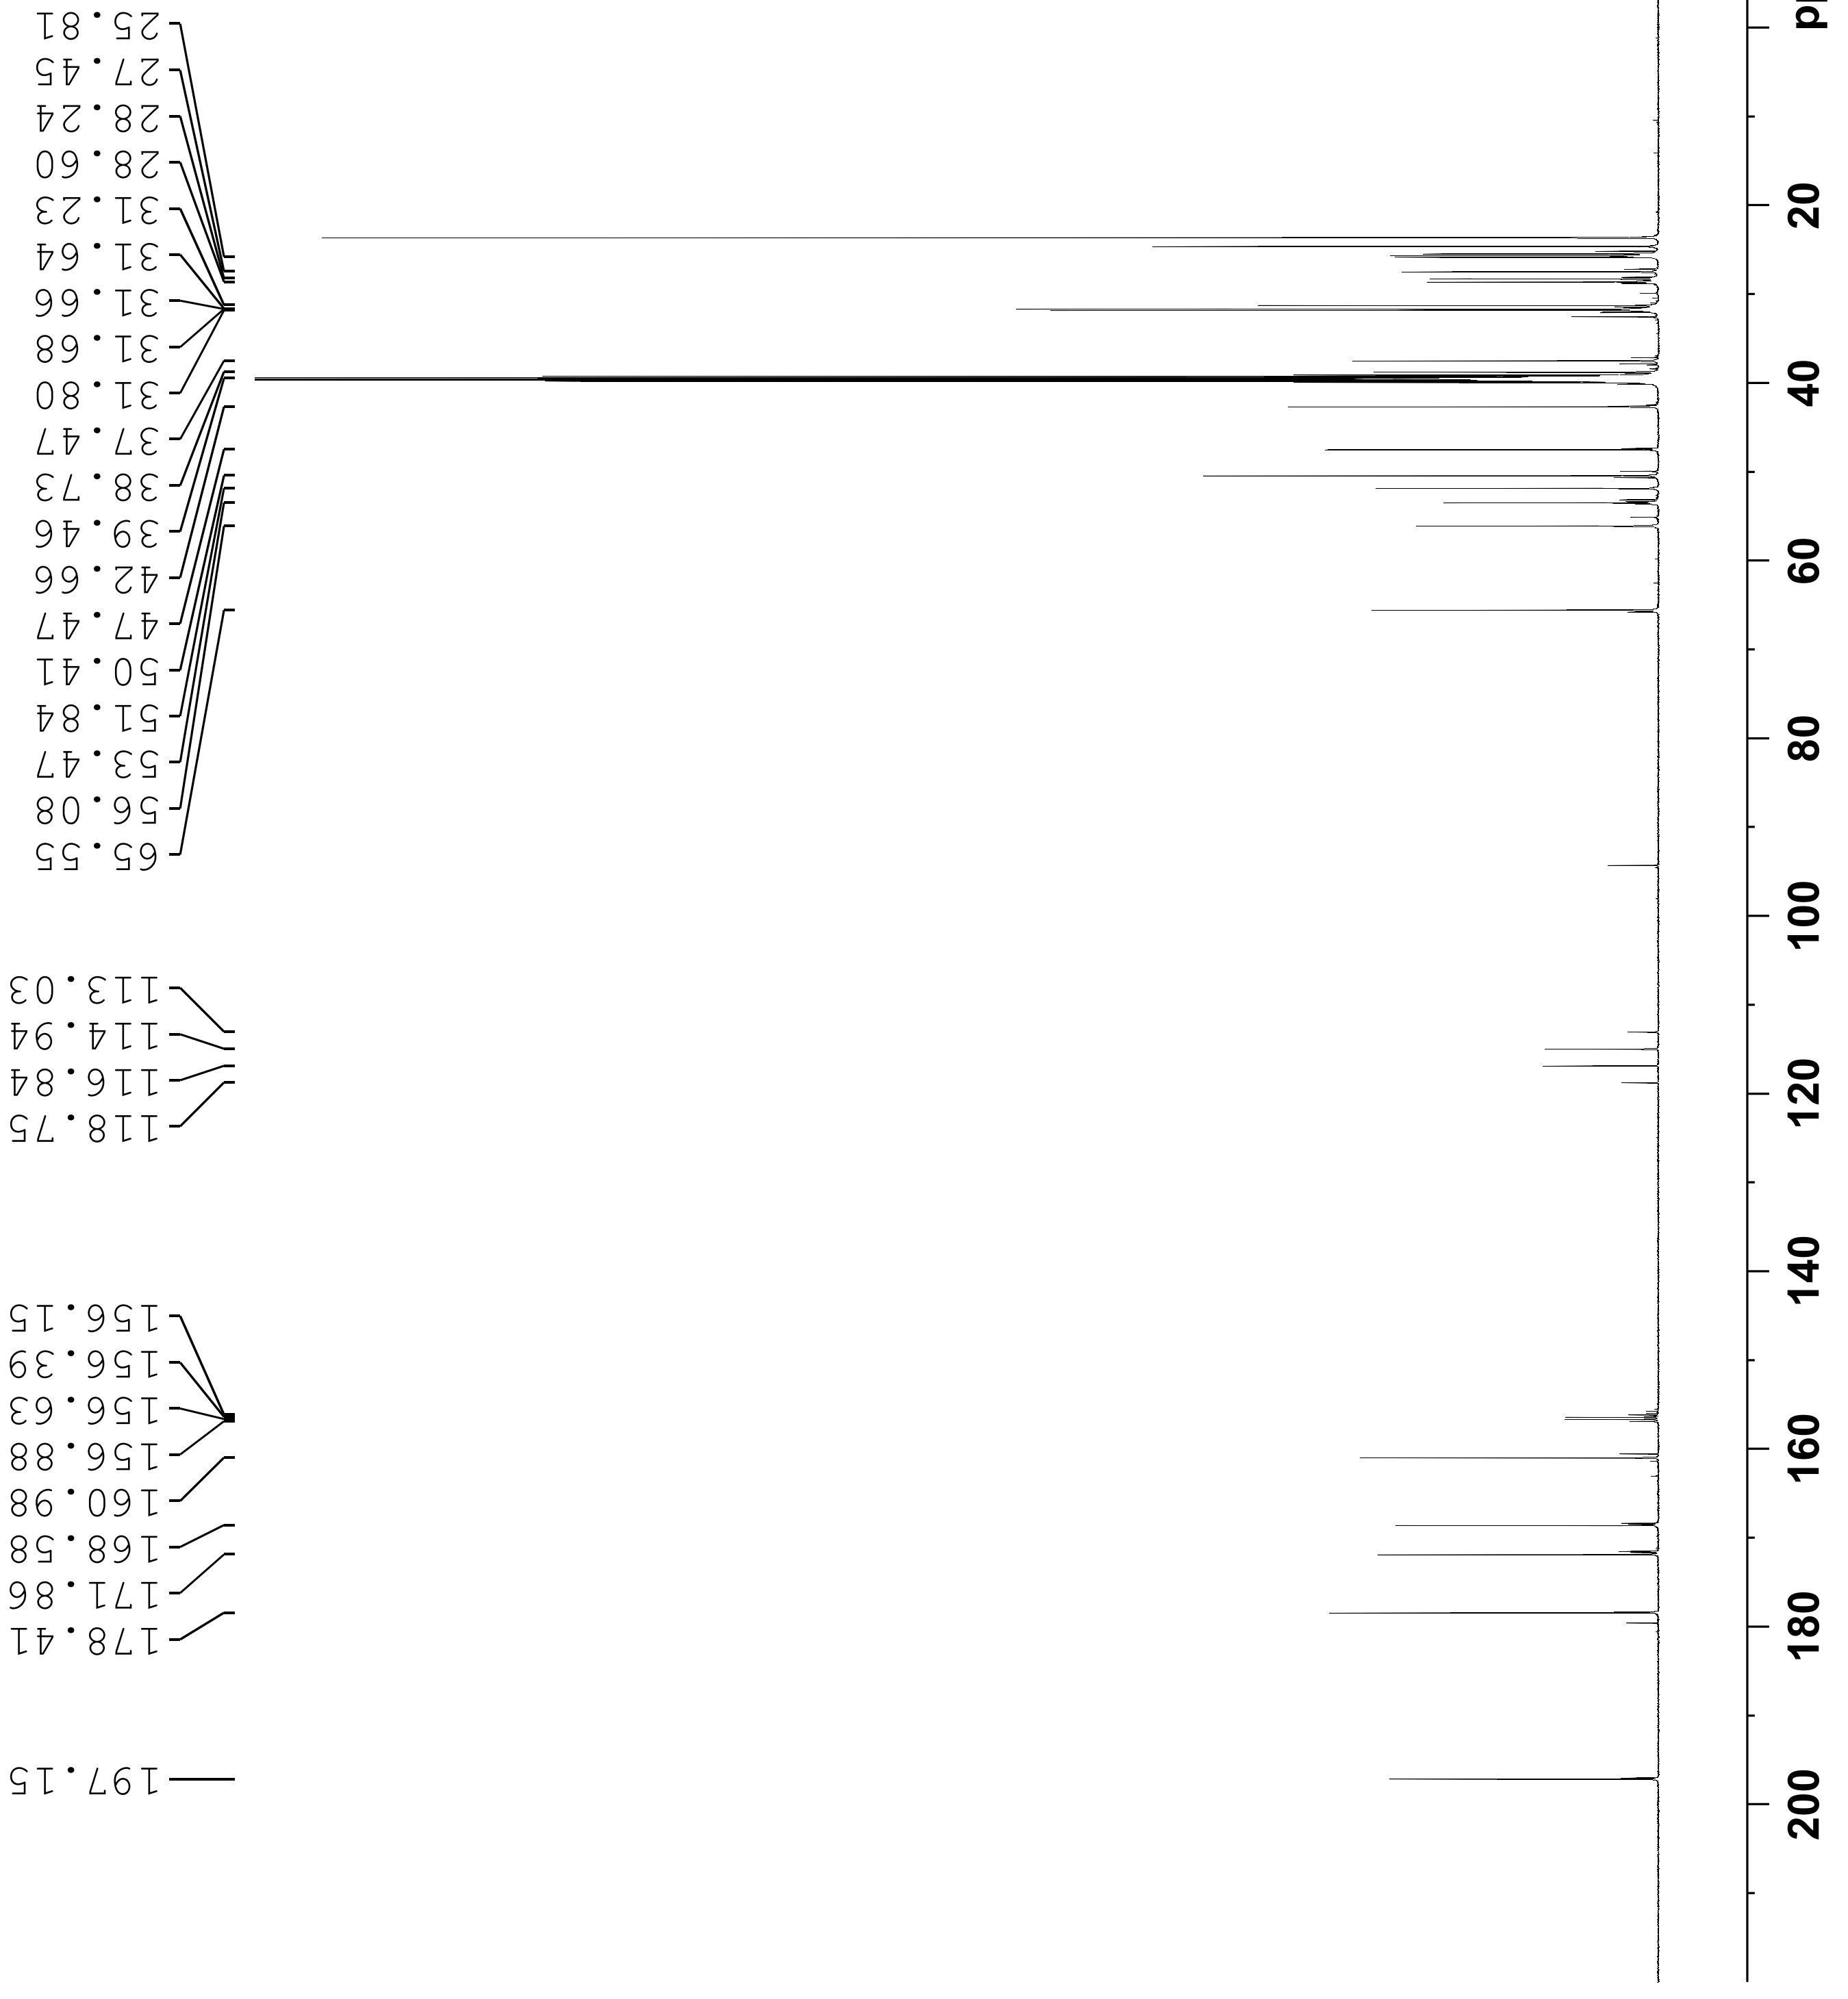

Current Data Parameters  
NAME RAY1216 (220214-04A)  
EXPNO 2  
PROCNO 1

F2 - Acquisition Parameters  
Date\_ 20220218  
Time\_ 19.32  
INSTRUM spect  
PROBHD 5 mm CPTCI 1H-  
PULPROG zgpg30  
TD 65536  
SOLVENT DMSO  
NS 2400  
DS 4  
SWH 36231.883 Hz  
FIDRES 0.552855 Hz  
AQ 0.9043968 sec  
RG 197.95  
DW 13.800 usec  
DE 18.00 usec  
TE 298.2 K  
D1 2.0000000 sec  
D11 0.0300000 sec  
TD0 1

==== CHANNEL f1 =====  
SFO1 150.9244374 MHz  
NUC1 13C  
P1 12.42 usec  
PLW1 92.0000000 W

==== CHANNEL f2 =====  
SFO2 600.1524006 MHz  
NUC2 1H  
CPDPRG[2] waltz16  
PCPD2 80.00 usec  
PLW2 7.0000000 W  
PLW12 0.05607200 W  
PLW13 0.03588600 W

F2 - Processing parameters  
SI 262144  
SF 150.9079016 MHz  
WDW EM  
SSB 0  
LB 1.00 Hz  
GB 0  
FC 1.40
