# Supplementary material for: Preclinical evaluation of the SARS-CoV-2 Mpro inhibitor RAY1216 shows improved pharmacokinetics compared with nirmatrelvir
Source: PubMed Central journal article supplement (PMC10994847; doi:10.1038/s41564-024-01618-9), 2024-03-29
Supplement: 41564_2024_1618_MOESM6_ESM.pdf [file 41564_2024_1618_MOESM6_ESM.pdf]

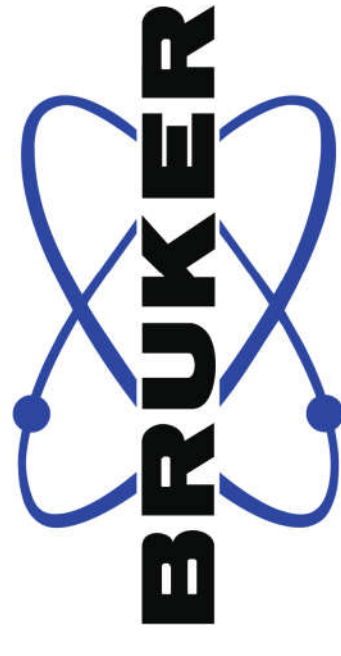

-73.63

Current Data Parameters  
NAME 2201B0030\_RC2103-220216-04A  
EXPNO 2  
PROCNO 1

F2 - Acquisition Parameters

Date\_ 20220222  
Time\_ 15.37 h  
INSTRUM spect  
PROBHD z113652\_0164 (  
PULPROG zgfgn.2  
TD 131072  
SOLVENT DMSO  
NS 128  
DS 4  
SWH 113636.367 Hz  
FIDRES 1.733953 Hz  
AQ 0.5767168 sec  
RG 193.09  
DW 4.400 usec  
DE 6.50 usec  
TE 298.1 K  
D1 1.0000000 sec  
D11 0.0300000 sec  
D12 0.0000200 sec  
TD0 1  
SFO1 470.2160219 MHz  
NUC1 19F  
P1 15.00 usec  
PLW1 33.5000000 W  
SFO2 499.7819991 MHz  
NUC2 1H  
CPDPRG[2] waltz16  
PCPD2 80.00 usec  
PLW2 14.0000000 W  
PLW12 0.3150000 W

F2 - Processing parameters

SI 262144  
SF 470.2630482 MHz  
WDW EM  
SSB 0  
LB 0.30 Hz  
GB 0  
PC 1.00

-65 -70 -75 -80 -85 -90 -95 ppm
